# Supplementary material for: Novel antimony phosphates with enlarged birefringence induced by lone pair cations
Source: Royal Society of Chemistry journal article supplement (doi:10.1039/d3dt03833e), 2024-01-01
Supplement: d3dt03833e1.pdf [file d3dt03833e1.pdf]

## Supplementary Information

### Novel Antimony Phosphates with Enlarged Birefringence

#### Induced by Lone Pair Cations

Mei Hu,<sup>a</sup> Jialong Wang,<sup>a</sup> Nuerbiye Tuerhong,<sup>a</sup> Zhiyuan Zhang,<sup>b</sup> Qun Jing,<sup>a,\*</sup> Zhaohui Chen,<sup>a,\*</sup> Yonglei Yang,<sup>c</sup> Ming-Hsien Lee<sup>d</sup>

<sup>a</sup> Xinjiang Key Laboratory of Solid State Physics and Devices, School of Physical Science and Technology & Key Laboratory of Oil and Gas Fine Chemicals, Ministry of Education and Xinjiang Uyghur Autonomous Region, School of Chemical Engineering and Technology, Xinjiang University, Urumqi 830017, China

<sup>b</sup> Xinjiang Laboratory of Phase Transitions and Microstructures in Condensed Matter Physics, College of Physical Science and Technology, Yili Normal University, Yining, Xinjiang, 835000, China

<sup>c</sup> Urumqi No. 1 Senior High School, North Second Lane, Kanas Lake Road, Toutunhe District, Urumqi 830023, China

<sup>d</sup> Department of Physics, Tamkang University, New Taipei City 25137, China

\*To whom correspondence should be addressed. E-mail: qunjing@xju.edu.cn (Qun Jing), chenzhaohui@xju.edu.cn (Zhaohui Chen).

## 1. Experimental Section

**Synthesis.** The polycrystalline powder of  $\text{Cs}_2\text{Sb}_3\text{O}(\text{PO}_4)_3$  was prepared via the solid-state reaction in the sealed system. The mixture of  $\text{Cs}_2\text{CO}_3$ ,  $\text{Sb}_2\text{O}_3$  and  $\text{P}_2\text{O}_5$  with a molar ratio of 2:3:3 was ground and preheated for 6 h at 120 °C. After sintering at 120 °C, the sample was ground again and loaded into another neat quartz tube, which was flame-sealed under  $10^{-3}$  Pa. Then the tube was heated at 360 °C for 24 h and then cooled to 30 °C at a rate of 3 °C /min. Finally, white  $\text{Cs}_2\text{Sb}_3\text{O}(\text{PO}_4)_3$  polycrystalline products were obtained.

**Table S1** Crystal data and structure refinement.

| Empirical formula                                             | $\text{Cs}_2\text{Sb}_3\text{O}(\text{PO}_4)_3$            | $(\text{NH}_4)_2\text{Sb}_4\text{O}_2(\text{H}_2\text{O})(\text{PO}_4)_2[\text{PO}_3(\text{OH})]_2$ |
|---------------------------------------------------------------|------------------------------------------------------------|-----------------------------------------------------------------------------------------------------|
| Formula weight                                                | 931.98 g/mol                                               | 955.00 g/mol                                                                                        |
| Temperature                                                   | 302.0 K                                                    | 298.0 K                                                                                             |
| Crystal system                                                |                                                            | Triclinic                                                                                           |
| Space group                                                   |                                                            | $P\bar{1}$ (no. 2)                                                                                  |
| Unit cell dimensions                                          | $a = 7.2896(2)$ (Å)                                        | $a = 7.2569(5)$ (Å)                                                                                 |
|                                                               | $b = 9.6583(3)$ (Å)                                        | $b = 7.3904(5)$ (Å)                                                                                 |
|                                                               | $c = 11.5880(3)$ (Å)                                       | $c = 18.9055(14)$ (Å)                                                                               |
|                                                               | $\alpha = 98.7480(10)^\circ$                               | $\alpha = 85.297(4)^\circ$                                                                          |
|                                                               | $\beta = 104.7060(10)^\circ$                               | $\beta = 81.574(4)^\circ$                                                                           |
|                                                               | $\gamma = 109.2790(10)^\circ$                              | $\gamma = 70.609(3)^\circ$                                                                          |
| Volume                                                        | 719.58(4) Å <sup>3</sup>                                   | 945.49(12) Å <sup>3</sup>                                                                           |
| Z                                                             | 2                                                          | 2                                                                                                   |
| Density                                                       | 4.301 g/cm <sup>3</sup>                                    | 3.354 g/cm <sup>3</sup>                                                                             |
| Absorption coefficient                                        | 10.971 mm <sup>-1</sup>                                    | 6.089 mm <sup>-1</sup>                                                                              |
| $F(000)$                                                      | 824                                                        | 884                                                                                                 |
| Theta range for data collection                               | 1.881 to 27.537 °                                          | 2.179 to 27.486 °                                                                                   |
| Limiting indices                                              | $-9 \leq h \leq 9, -12 \leq k \leq 12, -15 \leq l \leq 15$ | $-9 \leq h \leq 9, -9 \leq k \leq 9, -24 \leq l \leq 24$                                            |
| Reflections collected                                         | 16977                                                      | 49817                                                                                               |
| Independent reflections                                       | 3290 [ $R(\text{int}) = 0.0544$ ]                          | 4314 [ $R(\text{int}) = 0.0610$ ]                                                                   |
| Completeness to theta                                         | 99.3 %                                                     | 99.6 %                                                                                              |
| Data/restraints/parameters                                    | 3290 / 0 / 190                                             | 4314 / 6 / 262                                                                                      |
| Goodness-of-fit on $F^2$                                      | 1.087                                                      | 1.132                                                                                               |
| Final $R$ indexes [ $F_o^2 > 2\sigma(F_o^2)$ ] <sup>[a]</sup> | $R_1 = 0.0227, wR_2 = 0.0509$                              | $R_1 = 0.0227, wR_2 = 0.0450$                                                                       |
| $R$ indexes (all data) <sup>[a]</sup>                         | $R_1 = 0.0266, wR_2 = 0.0522$                              | $R_1 = 0.0288, wR_2 = 0.0508$                                                                       |
| Largest diff. peak and hole                                   | 1.191 and -1.858 e. Å <sup>-3</sup>                        | 1.237 and -0.950 e. Å <sup>-3</sup>                                                                 |

$$^a R_1 = \frac{\sum ||F_o| - |F_c||}{\sum |F_o|} \text{ and } wR_2 = \frac{[\sum w(F_o^2 - F_c^2)^2 / \sum wF_o^4]^{1/2}}{\sum wF_o^2} \text{ for } F_o^2 > 2\sigma(F_o^2)$$

**Table S2** Atomic coordinates ( $\times 10^4$ ) and equivalent isotropic displacement parameters ( $\text{\AA}^2 \times 10^3$ ) for CsSbPO.  $U_{\text{eq}}$  is defined as one-third of the trace the orthogonalised  $U_{ij}$  tensor and bond valence sum (BVS).

| Atoms | x        | y        | z       | $U_{\text{eq}}^{[a]}$ | BVS <sup>[b]</sup> |
|-------|----------|----------|---------|-----------------------|--------------------|
| Sb(1) | 8746(1)  | 1270(1)  | 6308(1) | 15(1)                 | 3.01               |
| Sb(2) | 9931(1)  | 7365(1)  | 9569(1) | 15(1)                 | 3.10               |
| Sb(3) | 5745(1)  | 4046(1)  | 8116(1) | 15(1)                 | 2.80               |
| Cs(1) | 8697(1)  | 6252(1)  | 5806(1) | 25(1)                 | 1.11               |
| Cs(2) | 4855(1)  | -1317(1) | 7932(1) | 29(1)                 | 1.25               |
| P(1)  | 11112(2) | 491(1)   | 8534(1) | 14(1)                 | 4.98               |
| P(2)  | 1695(2)  | 4701(1)  | 8334(1) | 13(1)                 | 5.07               |
| P(3)  | 5213(2)  | 2157(1)  | 5404(1) | 16(1)                 | 4.97               |
| O(1)  | 11686(5) | 1321(4)  | 9898(3) | 19(1)                 | 2.09               |
| O(2)  | 5122(5)  | 3537(4)  | 6243(3) | 19(1)                 | 2.24               |
| O(3)  | 7501(5)  | 6113(4)  | 8164(3) | 17(1)                 | 2.29               |
| O(4)  | 3348(6)  | 4654(4)  | 7712(4) | 31(1)                 | 2.11               |
| O(5)  | 8997(5)  | 571(4)   | 7853(3) | 18(1)                 | 2.30               |
| O(6)  | 1558(5)  | 6231(4)  | 8380(3) | 21(1)                 | 2.06               |
| O(7)  | 5956(5)  | 1201(3)  | 6266(3) | 16(1)                 | 2.14               |
| O(8)  | 12605(6) | 1143(4)  | 7898(4) | 26(1)                 | 1.52               |
| O(9)  | 6786(6)  | 2691(4)  | 4781(3) | 26(1)                 | 2.20               |
| O(10) | 10710(6) | -1199(4) | 8443(3) | 22(1)                 | 1.96               |
| O(11) | 3034(5)  | 1213(4)  | 4539(3) | 26(1)                 | 1.90               |
| O(12) | -371(5)  | 3464(4)  | 7497(4) | 27(1)                 | 1.60               |
| O(13) | 2290(6)  | 4400(4)  | 9593(3) | 30(1)                 | 1.95               |

<sup>[a]</sup> $U_{\text{eq}}$  is defined as one-third of the trace of the orthogonalized  $U_{ij}$  tensor

<sup>[b]</sup>BVS are calculated by using bond-valence theory ( $S_i = \exp[(R_o - R_i)/B]$ , where  $R_o$  is an empirical constant,  $R_i$  is the length of bond (in angstroms), and  $B = 0.37$ )

**Table S3** Atomic coordinates ( $\times 10^4$ ) and equivalent isotropic displacement parameters ( $\text{\AA}^2 \times 10^3$ ) for  $\text{NH}_4\text{SbPOH}$ .

| Atoms | <i>x</i> | <i>y</i> | <i>z</i> | $U_{\text{eq}}^{[\text{a}]}$ |
|-------|----------|----------|----------|------------------------------|
| Sb(1) | 9479(1)  | 8918(1)  | 8819(1)  | 14(1)                        |
| Sb(2) | 6509(1)  | 6161(1)  | 8790(1)  | 14(1)                        |
| Sb(3) | 8375(1)  | 9150(1)  | 6170(1)  | 14(1)                        |
| Sb(4) | 5619(1)  | 6121(1)  | 6175(1)  | 15(1)                        |
| P(1)  | 10065(1) | 5632(1)  | 7346(1)  | 14(1)                        |
| P(2)  | 7117(1)  | 2391(1)  | 9916(1)  | 12(1)                        |
| P(3)  | 2333(1)  | 7048(1)  | 5024(1)  | 12(1)                        |
| P(4)  | 6311(2)  | 11246(1) | 7741(1)  | 15(1)                        |
| O(1)  | 4892(4)  | 2985(4)  | 10151(1) | 17(1)                        |
| O(2)  | 7930(4)  | 221(4)   | 9776(1)  | 16(1)                        |
| O(3)  | 81(4)    | 7866(4)  | 5151(1)  | 18(1)                        |
| O(4)  | 10478(4) | 7244(4)  | 7661(2)  | 23(1)                        |
| O(5)  | 8668(4)  | 6698(4)  | 9129(1)  | 14(1)                        |
| O(6)  | 6296(4)  | 8405(4)  | 5850(1)  | 13(1)                        |
| O(7)  | 8993(4)  | 6265(4)  | 6681(2)  | 22(1)                        |
| O(8)  | 6714(4)  | 9920(4)  | 8417(2)  | 20(1)                        |
| O(9)  | 7514(4)  | 3428(4)  | 9186(1)  | 19(1)                        |
| O(10) | 2997(4)  | 4927(4)  | 4825(1)  | 18(1)                        |
| O(11) | 4573(4)  | 13009(4) | 7929(2)  | 26(1)                        |
| O(12) | 8849(5)  | 4703(4)  | 7906(2)  | 22(1)                        |
| O(13) | 6027(4)  | 10151(4) | 7141(2)  | 22(1)                        |
| O(14) | 3205(4)  | 8164(4)  | 4432(2)  | 22(1)                        |
| O(15) | 12033(4) | 4038(4)  | 7076(2)  | 26(1)                        |
| O(16) | 8145(4)  | 2870(4)  | 10476(2) | 22(1)                        |
| O(17) | 3073(4)  | 7182(4)  | 5741(2)  | 21(1)                        |
| O(18) | 3419(5)  | 8425(5)  | 6996(2)  | 41(1)                        |
| O(19) | 8229(4)  | 11764(4) | 7467(2)  | 23(1)                        |
| N(1)  | 12052(5) | 3178(5)  | 9218(2)  | 23(1)                        |
| N(2)  | 2704(5)  | 11768(5) | 5835(2)  | 24(1)                        |

**Table S4** Selected bond lengths (Å) for CsSbPO.

---

|               |          |               |          |
|---------------|----------|---------------|----------|
| Sb(1)-O(5)    | 1.995(3) | Cs(2)-O(1)#10 | 3.077(3) |
| Sb(1)-O(7)    | 2.000(3) | Cs(2)-O(3)#11 | 3.613(3) |
| Sb(1)-O(11)#2 | 2.233(3) | Cs(2)-O(4)#11 | 3.626(4) |
| Sb(1)-O(12)#3 | 2.136(3) | Cs(2)-O(5)    | 3.001(3) |
| Sb(2)-O(1)#6  | 2.122(3) | Cs(2)-O(6)#11 | 2.984(3) |
| Sb(2)-O(3)    | 1.943(3) | Cs(2)-O(7)    | 3.348(3) |
| Sb(2)-O(6)#3  | 2.394(3) | Cs(2)-O(8)#9  | 3.302(4) |
| Sb(2)-O(10)#4 | 2.087(3) | Cs(2)-O(9)#2  | 2.974(4) |
| Sb(2)-O(13)#7 | 2.440(4) | Cs(2)-O(10)#9 | 3.257(4) |
| Sb(3)-O(2)    | 2.046(3) | Cs(2)-O(11)#2 | 3.577(4) |
| Sb(3)-O(3)    | 1.967(3) | P(1)-O(1)     | 1.541(3) |
| Sb(3)-O(4)    | 1.990(4) | P(1)-O(5)     | 1.576(3) |
| Cs(1)-O(2)#8  | 3.255(3) | P(1)-O(8)     | 1.490(4) |
| Cs(1)-O(2)    | 3.238(4) | P(1)-O(10)    | 1.542(3) |
| Cs(1)-O(3)    | 3.080(3) | P(2)-O(4)     | 1.563(4) |
| Cs(1)-O(6)#3  | 3.183(4) | P(2)-O(6)     | 1.508(3) |
| Cs(1)-O(9)    | 3.152(4) | P(2)-O(12)    | 1.534(3) |
| Cs(1)-O(9)#1  | 3.387(4) | P(2)-O(13)    | 1.513(4) |
| Cs(1)-O(10)#4 | 3.256(3) | P(3)-O(2)     | 1.556(3) |
| Cs(1)-O(11)#8 | 3.134(3) | P(3)-O(7)     | 1.575(3) |
| Cs(1)-O(12)#3 | 3.700(4) | P(3)-O(9)     | 1.498(4) |
|               |          | P(3)-O(11)    | 1.522(4) |

---

**Table S5** Selected bond lengths (Å) for NH<sub>4</sub>SbPOH.

---

|               |          |              |          |
|---------------|----------|--------------|----------|
| Sb(1)-O(2)#1  | 2.105(3) | P(2)-O(2)    | 1.544(3) |
| Sb(1)-O(4)    | 2.497(3) | P(2)-O(9)    | 1.558(3) |
| Sb(1)-O(5)    | 1.940(2) | P(2)-O(16)   | 1.507(3) |
| Sb(1)-O(8)    | 2.126(3) | P(3)-O(3)    | 1.532(3) |
| Sb(1)-O(16)#2 | 2.317(3) | P(3)-O(10)   | 1.540(3) |
| Sb(2)-O(1)#3  | 2.150(3) | P(3)-O(14)   | 1.524(3) |
| Sb(2)-O(5)    | 1.942(3) | P(3)-O(17)   | 1.551(3) |
| Sb(2)-O(9)    | 2.026(3) | P(4)-O(8)    | 1.547(3) |
| Sb(2)-O(12)   | 2.257(3) | P(4)-O(11)   | 1.506(3) |
| Sb(3)-O(3)#4  | 2.228(3) | P(4)-O(13)   | 1.521(3) |
| Sb(3)-O(6)    | 1.953(3) | P(4)-O(19)   | 1.569(3) |
| Sb(3)-O(7)    | 2.198(3) | O(15)-H(15)  | 0.9351   |
| Sb(3)-O(13)   | 2.299(3) | O(18)-H(18A) | 0.8672   |
| Sb(3)-O(14)#5 | 2.247(3) | O(18)-H(18B) | 0.8550   |
| Sb(4)-O(6)    | 1.939(2) | O(19)-H(19)  | 0.9322   |
| Sb(4)-O(10)#6 | 2.086(3) | N(1)-H(1A)   | 0.9595   |
| Sb(4)-O(17)   | 2.020(3) | N(1)-H(1B)   | 0.9622   |
| Sb(4)-O(18)   | 2.400(4) | N(1)-H(1C)   | 0.9656   |
| P(1)-O(4)     | 1.507(3) | N(1)-H(1D)   | 0.9580   |
| P(1)-O(7)     | 1.534(3) | N(2)-H(2A)   | 0.9604   |
| P(1)-O(12)    | 1.543(3) | N(2)-H(2B)   | 0.9550   |
| P(1)-O(15)    | 1.567(3) | N(2)-H(2C)   | 0.9527   |
| P(2)-O(1)     | 1.533(3) | N(2)-H(2D)   | 0.9607   |

---

**Table S6** Hydrogen bonds for NH<sub>4</sub>SbPOH [Å and °]. D, donor; H, hydrogen; A, acceptor.

| D-H...A               | d(D-H) | d(H...A) | d(D...A) | <(DHA) |
|-----------------------|--------|----------|----------|--------|
| O(18)-H(18A)...O(13)  | 0.87   | 1.89     | 2.664(5) | 148.2  |
| N(1)-H(1A)...O(1)#4   | 0.96   | 2.07     | 2.865(4) | 139.2  |
| N(1)-H(1C)...O(11)#9  | 0.97   | 1.86     | 2.810(5) | 165.5  |
| N(2)-H(2A)...O(15)#10 | 0.96   | 1.95     | 2.885(5) | 162.7  |
| N(2)-H(2B)...O(3)#11  | 0.95   | 1.96     | 2.880(4) | 160.9  |

Symmetry transformations used to generate equivalent atoms:

#1 x,y+1,z #2 -x+2,-y+1,-z+2 #3 -x+1,-y+1,-z+2 #4 x+1,y,z #5 -x+1,-y+2,-z+1 #6 -x+1,-y+1,-z+1 #7 x,y-1,z #8 x-1,y,z #9 x+1,y-1,z #10 x-1,y+1,z #11 -x,-y+2,-z+1



**Table S7** The Distortion Index of CsSbPO and NH<sub>4</sub>SbPOH.

| <b>compound</b>                                                  | <b>Group</b>                         | <b>Distortion index</b> |
|------------------------------------------------------------------|--------------------------------------|-------------------------|
| Cs <sub>2</sub> Sb <sub>3</sub> O(PO <sub>4</sub> ) <sub>3</sub> | P(1)O <sub>4</sub>                   | 0.01535                 |
|                                                                  | P(2)O <sub>4</sub>                   | 0.01246                 |
|                                                                  | P(3)O <sub>4</sub>                   | 0.01810                 |
|                                                                  | Sb(3)O <sub>3</sub>                  | 0.01498                 |
|                                                                  | Sb(1)O <sub>4</sub>                  | 0.04462                 |
|                                                                  | Sb(2)O <sub>5</sub>                  | 0.08009                 |
| NHSbPOH                                                          | P(1)O <sub>3</sub> OH                | 0.01121                 |
|                                                                  | P(2)O <sub>3</sub>                   | 0.01021                 |
|                                                                  | P(3)O <sub>4</sub>                   | 0.00575                 |
|                                                                  | P(4)O <sub>3</sub> OH                | 0.01442                 |
|                                                                  | Sb(1)O <sub>5</sub>                  | 0.07650                 |
|                                                                  | Sb(2)O <sub>4</sub>                  | 0.05231                 |
|                                                                  | Sb(3)O <sub>5</sub>                  | 0.04240                 |
|                                                                  | Sb(4)O <sub>3</sub> H <sub>2</sub> O | 0.06833                 |

**Table S8** The obtained Born effective charges in CsSbPO.

| Crystal | elemental  | $q_{xx}$       | $q_{yy}$       | $q_{zz}$       | $\Delta q(q_{yy}-q_{zz})$ |
|---------|------------|----------------|----------------|----------------|---------------------------|
| CsSbPO  | O1         | -0.91603       | -2.45537       | -1.7271        | -0.72827                  |
|         | O2         | -0.84124       | -1.73875       | -2.81918       | 1.08043                   |
|         | O3         | -2.17503       | -1.77026       | -0.99661       | -0.77365                  |
|         | O4         | -3.2474        | -1.10017       | -1.14533       | 0.04516                   |
|         | O5         | -1.27591       | -1.7733        | -2.32666       | 0.55336                   |
|         | O6         | -1.36653       | -1.95625       | -1.23308       | -0.72317                  |
|         | O7         | -2.03045       | -1.88448       | -1.08447       | -0.80001                  |
|         | O8         | -1.35825       | -1.47513       | -1.4256        | -0.04953                  |
|         | O9         | -1.48817       | -1.40344       | -1.69843       | 0.29499                   |
|         | O10        | -1.11705       | -2.3106        | -2.38719       | 0.07659                   |
|         | O11        | -2.21471       | -1.28636       | -1.11654       | -0.16982                  |
|         | O12        | -2.49427       | -1.90572       | -1.22718       | -0.67854                  |
|         | O13        | -1.26402       | -1.17047       | -3.01791       | 1.84744                   |
|         | P1         | 2.91133        | 4.25158        | 3.74288        | 0.5087                    |
|         | P2         | 4.30216        | 3.32964        | 3.73334        | -0.4037                   |
|         | P3         | 3.58727        | 3.35572        | 3.24701        | 0.10871                   |
|         | <b>Sb1</b> | <b>3.16883</b> | <b>2.99614</b> | <b>2.39575</b> | <b>0.60039</b>            |
|         | <b>Sb2</b> | <b>2.31193</b> | <b>3.18183</b> | <b>3.89649</b> | <b>-0.71466</b>           |
|         | <b>Sb3</b> | <b>2.87607</b> | <b>2.31521</b> | <b>2.5791</b>  | <b>-0.26389</b>           |
|         | Cs1        | 1.23771        | 1.48769        | 1.31267        | 0.17502                   |
| Cs2     | 1.39378    | 1.31249        | 1.29804        | 0.01445        |                           |

**Table S9** The obtained Born effective charges in NH<sub>4</sub>SbPOH.

| Crystal               | elemental | $q_{xx}$ | $q_{yy}$ | $q_{zz}$ | $\Delta q(q_{zz}-q_{xx})$ |
|-----------------------|-----------|----------|----------|----------|---------------------------|
| NH <sub>4</sub> SbPOH | H1        | 1.17736  | 0.49328  | 0.81375  | -0.36361                  |
|                       | H2        | 0.5867   | 0.8708   | 0.73186  | 0.14516                   |
|                       | H3        | 1.1988   | 0.54596  | 0.3479   | -0.8509                   |
|                       | H4        | 0.4155   | 1.29375  | 0.4835   | 0.068                     |
|                       | H5        | 0.373    | 0.29915  | 0.42278  | 0.04978                   |
|                       | H6        | 0.3078   | 0.68671  | 0.40959  | 0.10179                   |
|                       | H7        | 0.44653  | 0.24905  | 1.27572  | 0.82919                   |
|                       | H8        | 1.19585  | 0.38294  | 0.2368   | -0.95905                  |
|                       | H9        | 0.44215  | 0.51601  | 0.56669  | 0.12454                   |
|                       | H10       | 0.28445  | 0.34642  | 0.2915   | 0.00705                   |
|                       | H11       | 0.8509   | 0.43462  | 0.41996  | -0.43094                  |
|                       | H12       | 0.24715  | 1.17501  | 0.48362  | 0.23647                   |
|                       | N1        | -0.8615  | -0.53681 | -0.88011 | -0.01861                  |
|                       | N2        | -0.60599 | -0.96896 | -0.52479 | 0.0812                    |
|                       | O1        | -2.02166 | -0.93322 | -2.67769 | -0.65603                  |
|                       | O2        | -0.93863 | -2.31762 | -2.40679 | -1.46816                  |
|                       | O3        | -3.21667 | -0.77107 | -1.77503 | 1.44164                   |
|                       | O4        | -1.47109 | -1.92704 | -1.56384 | -0.09275                  |
|                       | O5        | -1.06645 | -2.92946 | -0.86102 | 0.20543                   |
|                       | O6        | -2.0466  | -1.9053  | -1.0943  | 0.9523                    |
|                       | O7        | -1.0005  | -1.40873 | -2.82703 | -1.82653                  |
|                       | O8        | -1.75322 | -1.15544 | -2.15568 | -0.40246                  |
|                       | O9        | -1.01551 | -2.60033 | -1.67983 | -0.66432                  |
|                       | O10       | -1.30839 | -1.75125 | -2.36203 | -1.05364                  |
| O11                   | -2.20934  | -1.20918 | -1.65793 | 0.55141  |                           |
| O12                   | -1.9359   | -1.56165 | -2.0024  | -0.0665  |                           |

|  |            |                |                |                |                 |
|--|------------|----------------|----------------|----------------|-----------------|
|  | O13        | -1.23923       | -1.78396       | -1.87557       | -0.63634        |
|  | O14        | -1.30875       | -1.7044        | -1.52378       | -0.21503        |
|  | O15        | -2.28941       | -1.38308       | -1.25139       | 1.03802         |
|  | O16        | -1.90955       | -1.29612       | -1.4441        | 0.46545         |
|  | O17        | -2.15976       | -0.88138       | -2.29924       | -0.13948        |
|  | O18        | -1.45256       | -1.65803       | -1.24889       | 0.20367         |
|  | O19        | -1.07733       | -1.96291       | -0.99267       | 0.08466         |
|  | P1         | 3.58214        | 3.32151        | 3.86898        | 0.28684         |
|  | P2         | 3.41176        | 4.2061         | 3.71624        | 0.30448         |
|  | P3         | 4.31958        | 3.34718        | 3.89194        | -0.42764        |
|  | P4         | 3.17373        | 3.46462        | 3.64375        | 0.47002         |
|  | <b>Sb1</b> | <b>2.14819</b> | <b>3.33164</b> | <b>3.14818</b> | <b>0.99999</b>  |
|  | <b>Sb2</b> | <b>2.34542</b> | <b>2.99525</b> | <b>3.7544</b>  | <b>1.40898</b>  |
|  | <b>Sb3</b> | <b>3.36745</b> | <b>2.26384</b> | <b>3.27536</b> | <b>-0.09209</b> |
|  | <b>Sb4</b> | <b>3.01381</b> | <b>2.46177</b> | <b>3.32159</b> | <b>0.30778</b>  |

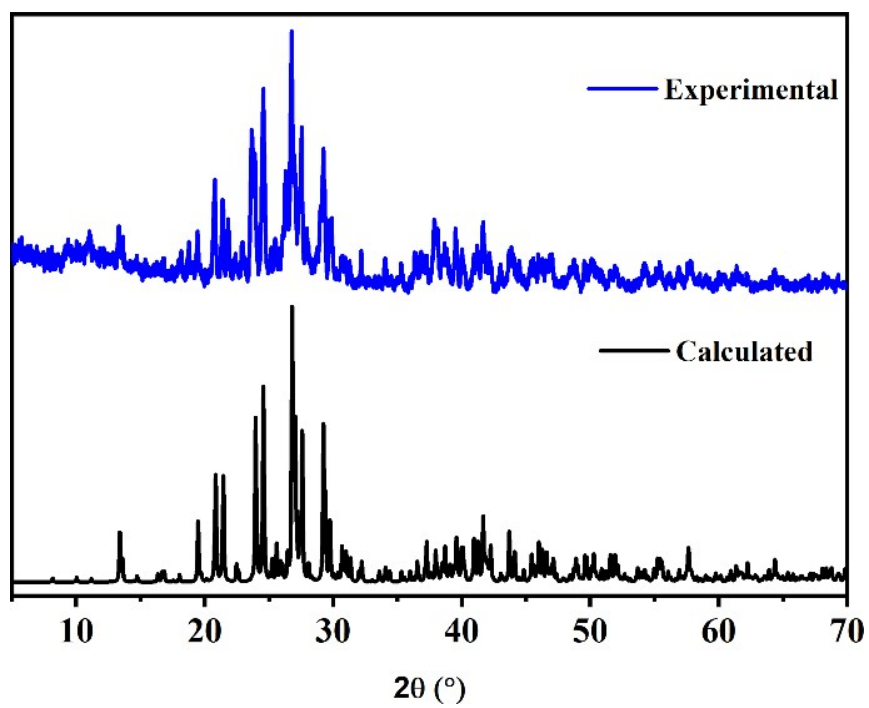

**Figure S1** The XRD patterns of CsSbPO.

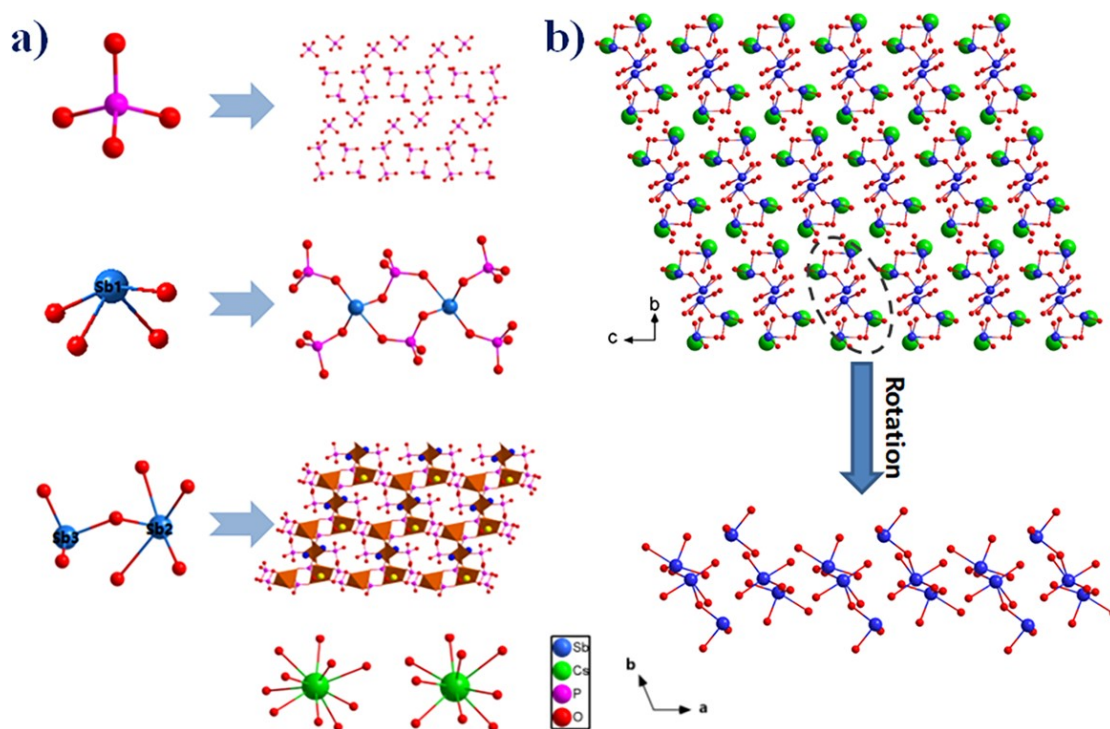

**Figure S2** (a) 0D  $[\text{PO}_4]$ , 0D  $[\text{Sb}_2\text{P}_6\text{O}_{24}]$  cluster, 2D layer of  $[\text{Sb-P-O}]$  and Coordination modes of  $[\text{CsO}_9]$  and  $[\text{CsO}_{10}]$  polyhedron; (b) Overall arrangement of cations.

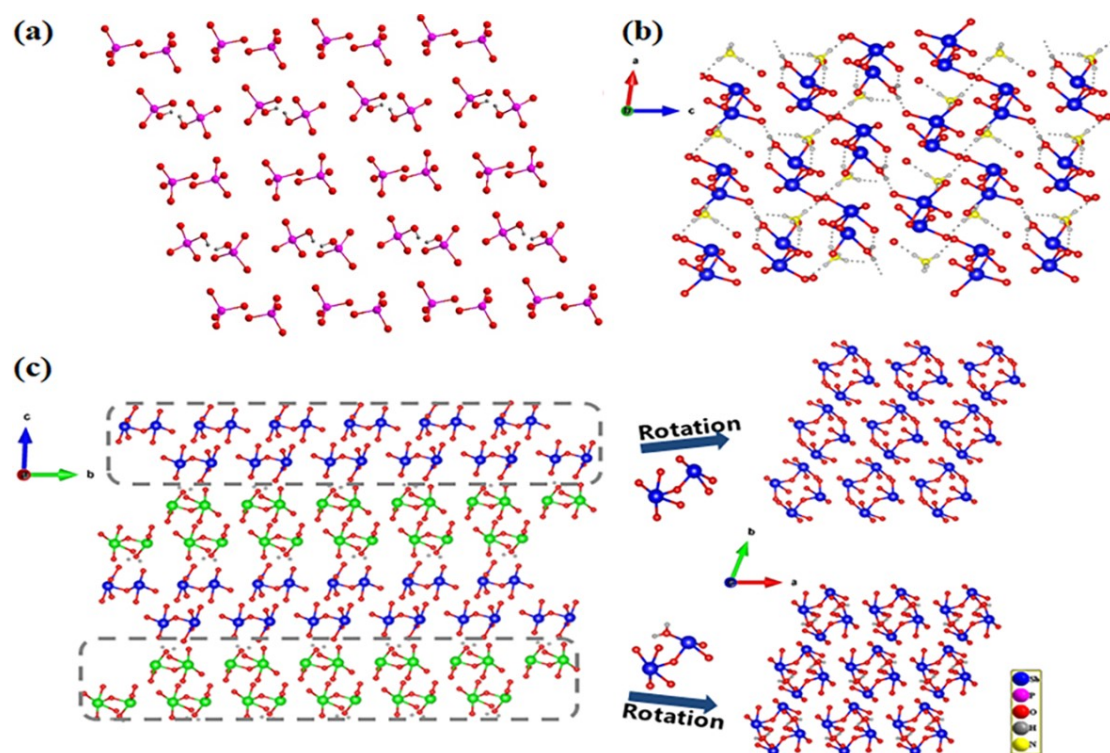

**Figure S3** (a)  $\text{PO}_4$  overall alignment; (b) Sb-O view in the  $ac$  plane and N-H arrangement; (c) Sb cation arrangement ( $[\text{Sb}_2\text{O}_8]$  dimer: blue,  $[\text{Sb}_2\text{O}_7(\text{H}_2\text{O})]$  dimer: green).

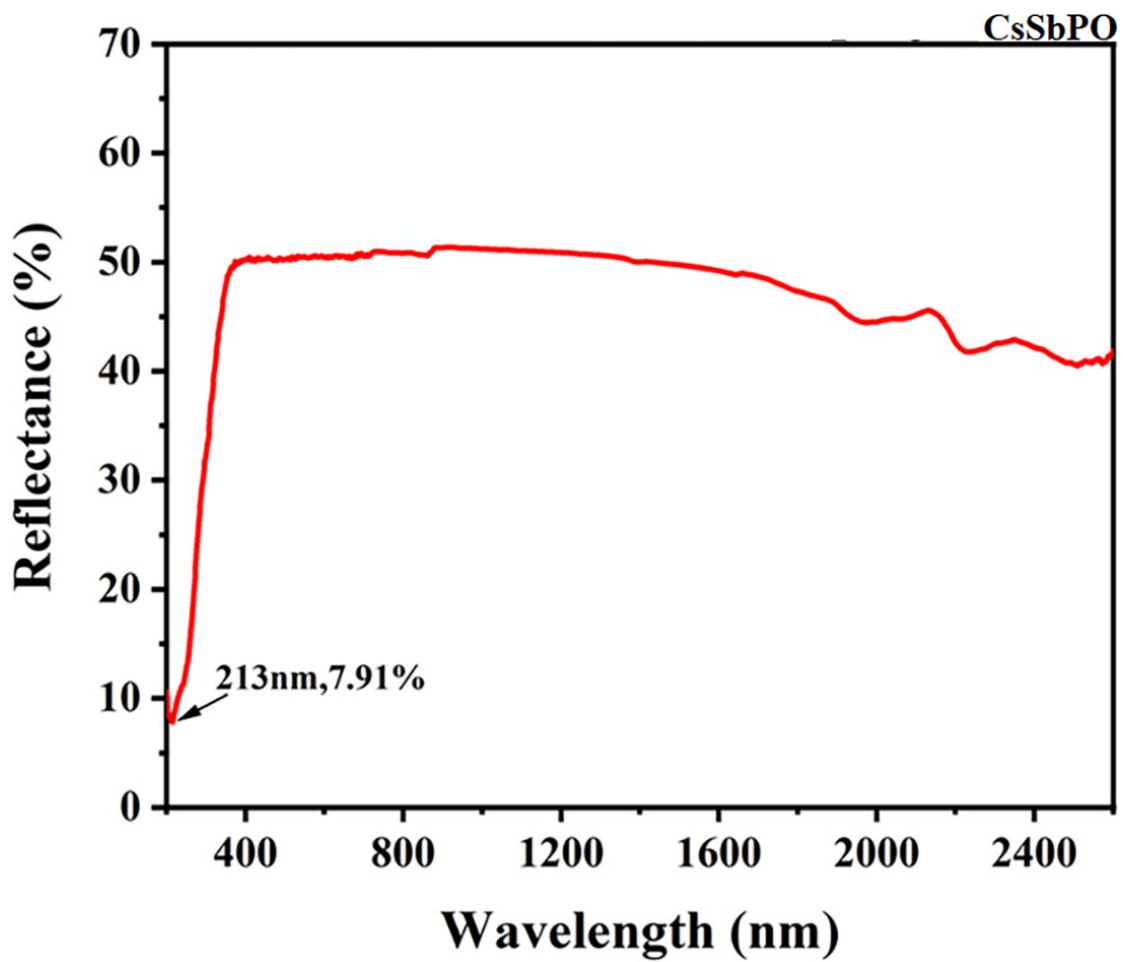

**Figure S4** The UV-vis-NIR diffuse reflectance spectrum of CsSbPO.

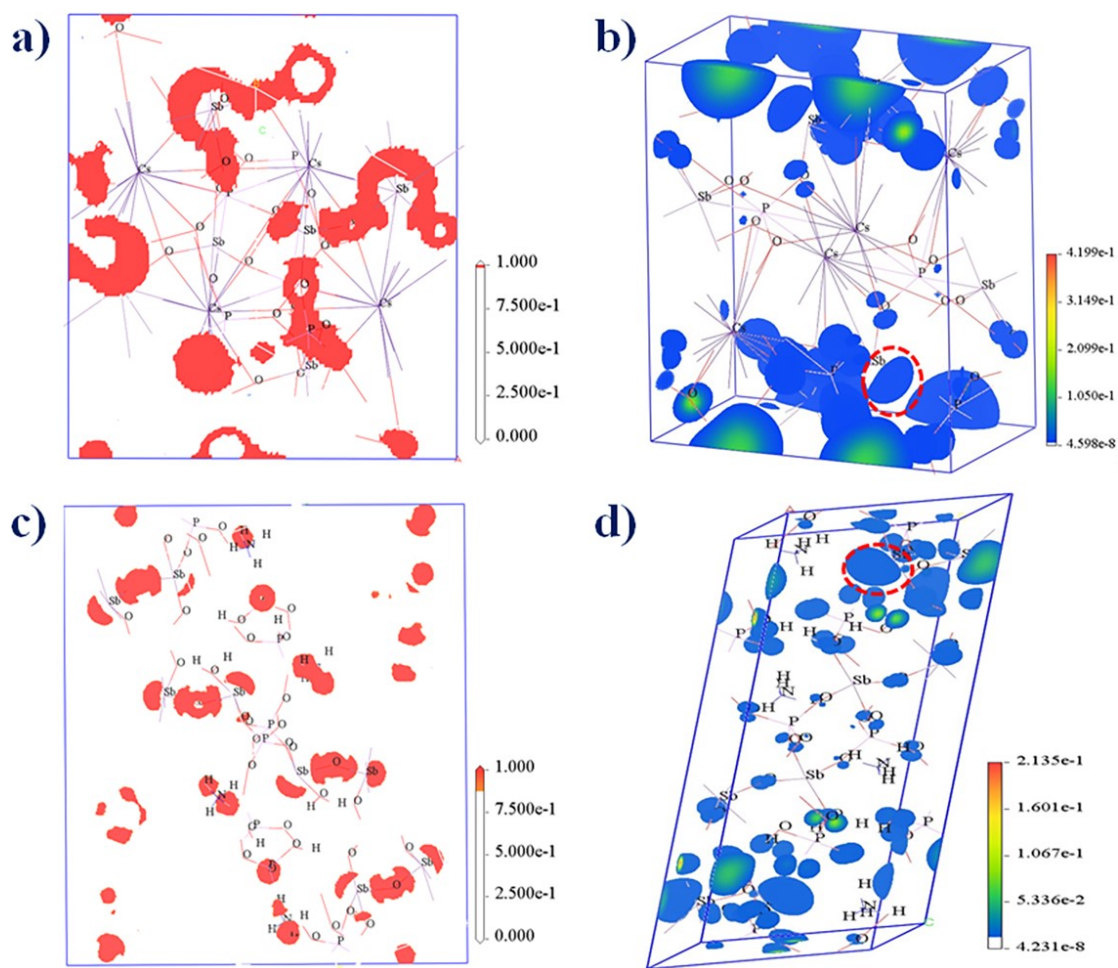

**Figure S5** Election localization function (ELF) diagrams of (a) CsSbPO and (c) NH<sub>4</sub>SbPOH. The whole crystal orbitals near the Fermi level of (b) CsSbPO and (d) NH<sub>4</sub>SbPOH.
